# Supplementary material for: Machine Learning Models to Predict Survival Outcomes According to the Surgical Approach of Primary Radical Hysterectomy in Patients with Early Cervical Cancer
Source: MDPI journal article supplement (doi:10.3390/cancers13153709), 2021-07-23
Supplement: s1 [file s1]

**Table 1.** List of machine learning methods used in this study.

| Method                    | Package      | Version |
|---------------------------|--------------|---------|
| Random forest             | randomForest | 4.6-14  |
| Support Vector Machine    | e1071        | 1.7-4   |
| Decision Tree             | C50          | 0.1.3.1 |
| Neural Network            | nnet         | 7.3-14  |
| K-Nearest Neighbors       | caret        | 6.0-86  |
| Naïve Bayes               | caret        | 6.0-86  |
| Gradient Boosting         | gbm          | 2.1.8   |
| eXtreme Gradient Boosting | xgboost      | 1.3.2.1 |

**Table 2.** Clinicopathologic characteristics of study population.

| Characteristics                                | All patients<br>(n=1056, %) |
|------------------------------------------------|-----------------------------|
| Age, years                                     | 48.0 (24.6–87.0)            |
| Surgical approach                              |                             |
| Open surgery                                   | 539 (51.0)                  |
| Laparoscopy                                    | 517 (49.0)                  |
| 2009 FIGO stage                                |                             |
| IB1                                            | 878 (83.1)                  |
| IB2                                            | 178 (16.9)                  |
| Histologic type                                |                             |
| Squamous cell carcinoma                        | 744 (70.5)                  |
| Adenocarcinoma                                 | 263 (24.9)                  |
| Adenosquamous carcinoma                        | 49 (4.6)                    |
| Preoperative conization                        |                             |
| No                                             | 709 (67.1)                  |
| Yes                                            | 347 (32.9)                  |
| Preoperative tumor markers                     |                             |
| CEA, ng/ml <sup>a</sup>                        | 1.3 (0.1–210.0)             |
| SCC, ng/ml <sup>b</sup>                        | 1.1 (0.1–118.7)             |
| CA-125, IU/ml <sup>c</sup>                     | 12.0 (0.9–506.8)            |
| Cervical mass size by MRI, mm                  | 22.0 (0–82.0)               |
| No residual tumor                              | 301 (28.5)                  |
| <20                                            | 164 (15.5)                  |
| ≥20 and <40                                    | 392 (37.1)                  |
| ≥40                                            | 199 (18.8)                  |
| PM invasion on imaging*                        |                             |
| No                                             | 798 (75.6)                  |
| Suspicious                                     | 258 (24.4)                  |
| LN metastasis on imaging <sup>†</sup>          |                             |
| No                                             | 902 (85.4)                  |
| Suspicious                                     | 154 (14.6)                  |
| Pelvic lymphadenectomy                         |                             |
| No                                             | 11 (1.0)                    |
| Yes                                            | 1045 (99.0)                 |
| Para-aortic lymphadenectomy                    |                             |
| No                                             | 862 (81.6)                  |
| Sampling/Dissection                            | 194 (18.4)                  |
| Pathologic cervical mass size, mm <sup>‡</sup> | 27.0 (0–110.0)              |
| No residual tumor                              | 134 (12.7)                  |
| <20                                            | 248 (23.5)                  |
| ≥20 and <40                                    | 402 (38.1)                  |
| ≥40                                            | 272 (25.8)                  |
| Pathologic risk factors                        |                             |

|                              |            |
|------------------------------|------------|
| PM invasion                  | 152 (14.4) |
| LN metastasis                | 221 (20.9) |
| Resection margin involvement | 30 (2.8)   |
| LVSI                         | 405 (38.4) |
| Invasion depth $\geq 1/2$    | 574 (54.4) |
| Adjuvant treatment           |            |
| No                           | 497 (47.1) |
| Radiation only               | 193 (18.3) |
| CCRT                         | 366 (34.7) |

Presented with n (%) or median (range). Abbreviations: CA-125, cancer antigen 125; CEA, carcinoembryonic antigen; CCRT, concurrent chemoradiation therapy; CT, computed tomography; FIGO, International Federation of Gynecology and Obstetrics; LN, lymph node; LVSI, lymphovascular space invasion; MRI, magnetic resonance imaging; PET, positron emission tomography; PM, parametrial; SCC, squamous cell carcinoma antigen. \*Measured by preoperative MRI; †Evaluated by MRI, CT, or PET/CT; ‡Measured on the uterine specimen. Missing data: <sup>a</sup>353; <sup>b</sup>109; <sup>c</sup>659.

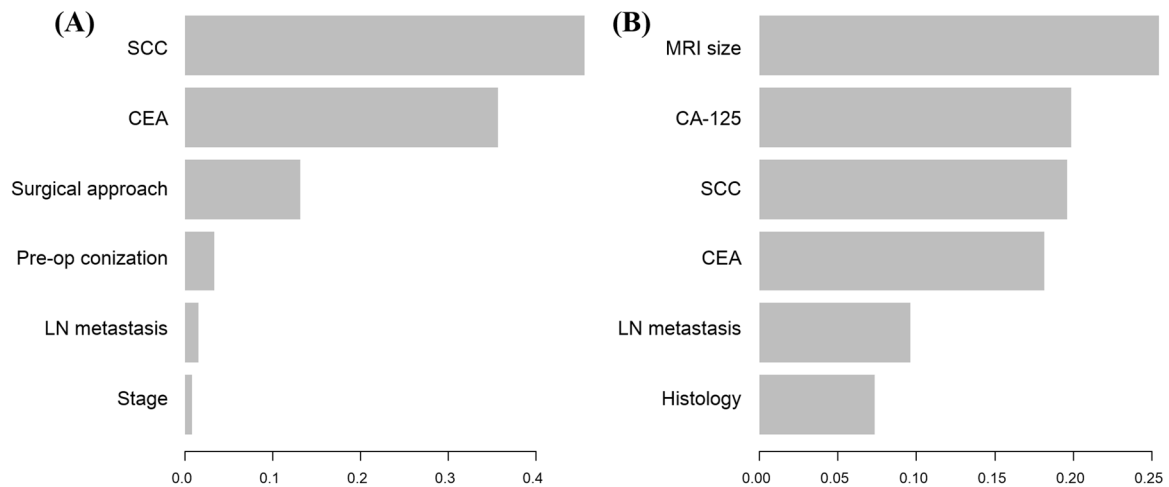

Figure S1: Importance values of predictors from the machine learning algorithms: (A) 5-year PFS rate; (B) 5-year OS rate
